# Supplementary material for: Studies on the epoxidation of methallyl chloride over TS-1 microsphere catalysts in a continuous slurry reactor
Source: Royal Society of Chemistry journal article supplement (doi:10.1039/c5cy02002f), 2016-01-01
Supplement: c5cy02002f1.pdf [file c5cy02002f1.pdf]

**Electronic Supplementary Information (ESI)**

**for**

**The studies on the epoxidation of methallyl chloride over the TS-1 microsphere  
catalyst in the continuous slurry reactor**

Zhixia Deng, Yulin Yang, Xinqing Lu, Jianghong Ding, Mingyuan He, Peng Wu\*

*Shanghai Key Laboratory of Green Chemistry and Chemical Processes, Schooll of  
Chemistry and Molecular Engining, East China Normal University, Shanghai  
200062, China*

*E-mail : [pwu@chem.ecnu.edu.cn](mailto:pwu@chem.ecnu.edu.cn) (P. Wu)*

*Fax : +86-21 62232292*

**LIST OF TABLES:**

*Table S1.* The ratio of Si/Ti for fresh, first regenerated, second regenerated, and thirdly regenerated TS-1-MS catalysts given by ICP.

**LIST OF FIGURES:**

*Figure S1.* UV-vis spectra of TS-1 (a) and TS-1-MS (b).

*Figure S2.* XRD patterns (A), UV-vis spectra (B) of fresh TS-1-MS (a), first regenerated (b), second regenerated (c), and thirdly regenerated (d).

**Table S1** The ratio of Si/Ti for fresh, first regenerated, second regenerated, and thirdly regenerated TS-1-MS catalysts given by ICP.

| Samples | fresh | first<br>regenerated | second<br>regenerated | thirdly<br>regenerated |
|---------|-------|----------------------|-----------------------|------------------------|
| Si/Ti   | 40    | 41                   | 41                    | 42                     |

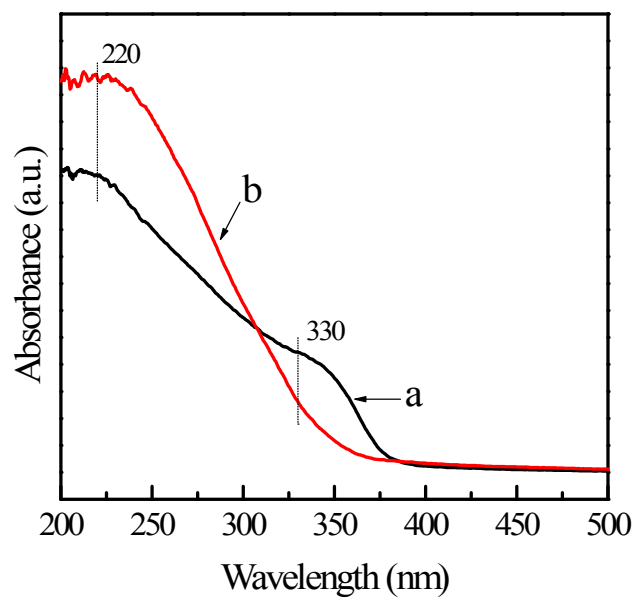

**Figure S1.** UV-vis spectra of TS-1 (a) and TS-1-MS (b).

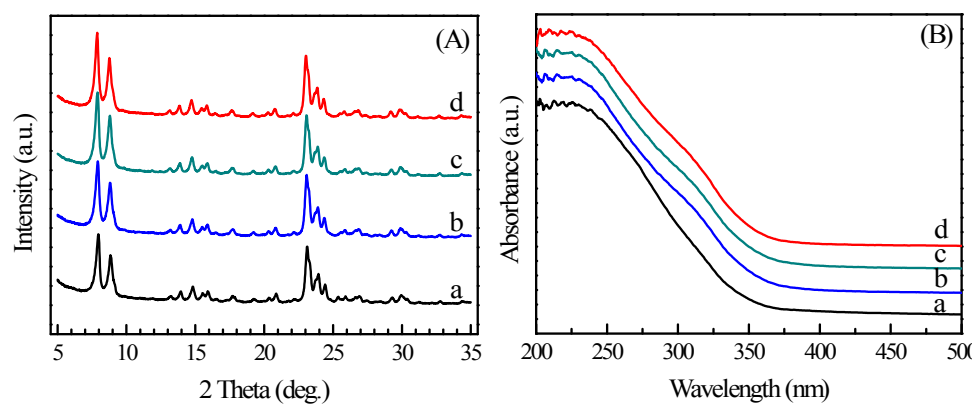

**Figure S2.** XRD patterns (A), UV-vis spectra (B) of fresh TS-1-MS (a), first regenerated (b), second regenerated (c), and thirdly regenerated (d).
